# Supplementary material
Source: publisher site journal article supplement (https://www.spandidos-publications.com/5392/downloadSupplementary)

Figure S1. Effects of WEE1 (MK-1775) and PARP (BMN673) inhibitors alone and in combination on the apoptosis of DAOY and UW228-3 medulloblastomacell lines. The cells were treated and apoptosis was measured for up to 72 h. Single treatments are presented for (A and D) MK-1775 and for (B and E) BMN673. (C and F) Combined treatments are presented. The graphs represent one experimental run per cell line. MK, MK-1775; BMN, BMN673.

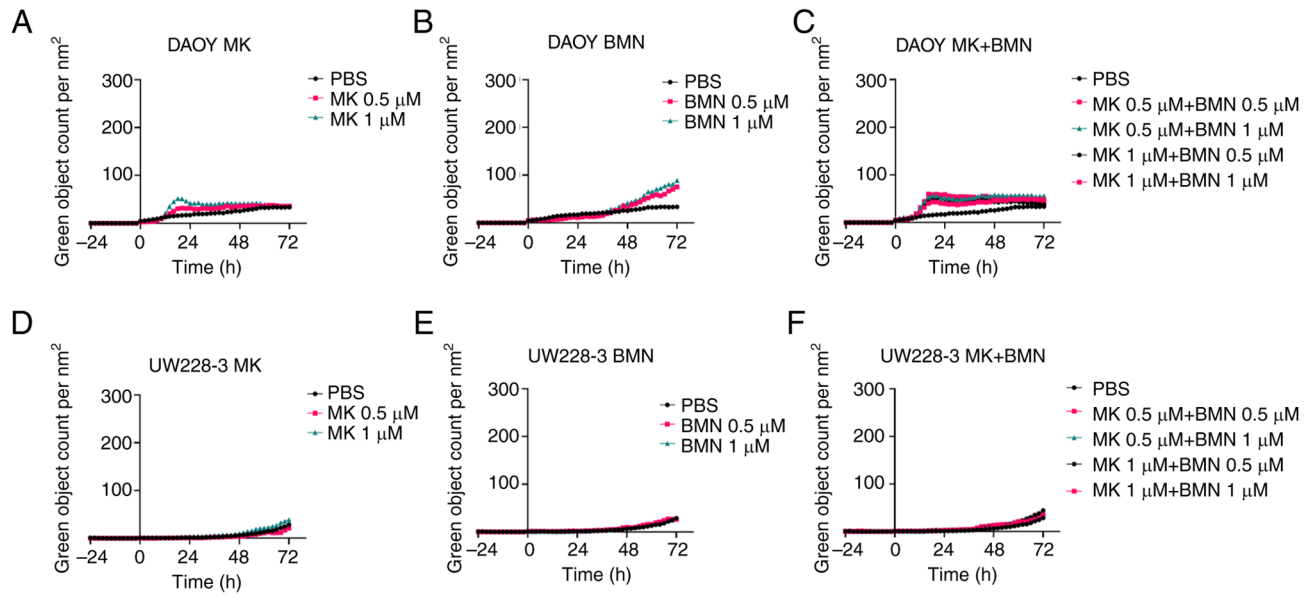

Figure S2. Representative dot plots from FACS analysis. The gates delineate the areas for analysis for DAOY and UW228-3 cells following treatment with WEE1 (MK-1775) and PARP (BMN673) inhibitors alone and in combination. MK, MK-1775; BMN, BMN673; SSC-H, side scatter-height; FSC-H, forward scatter-height.

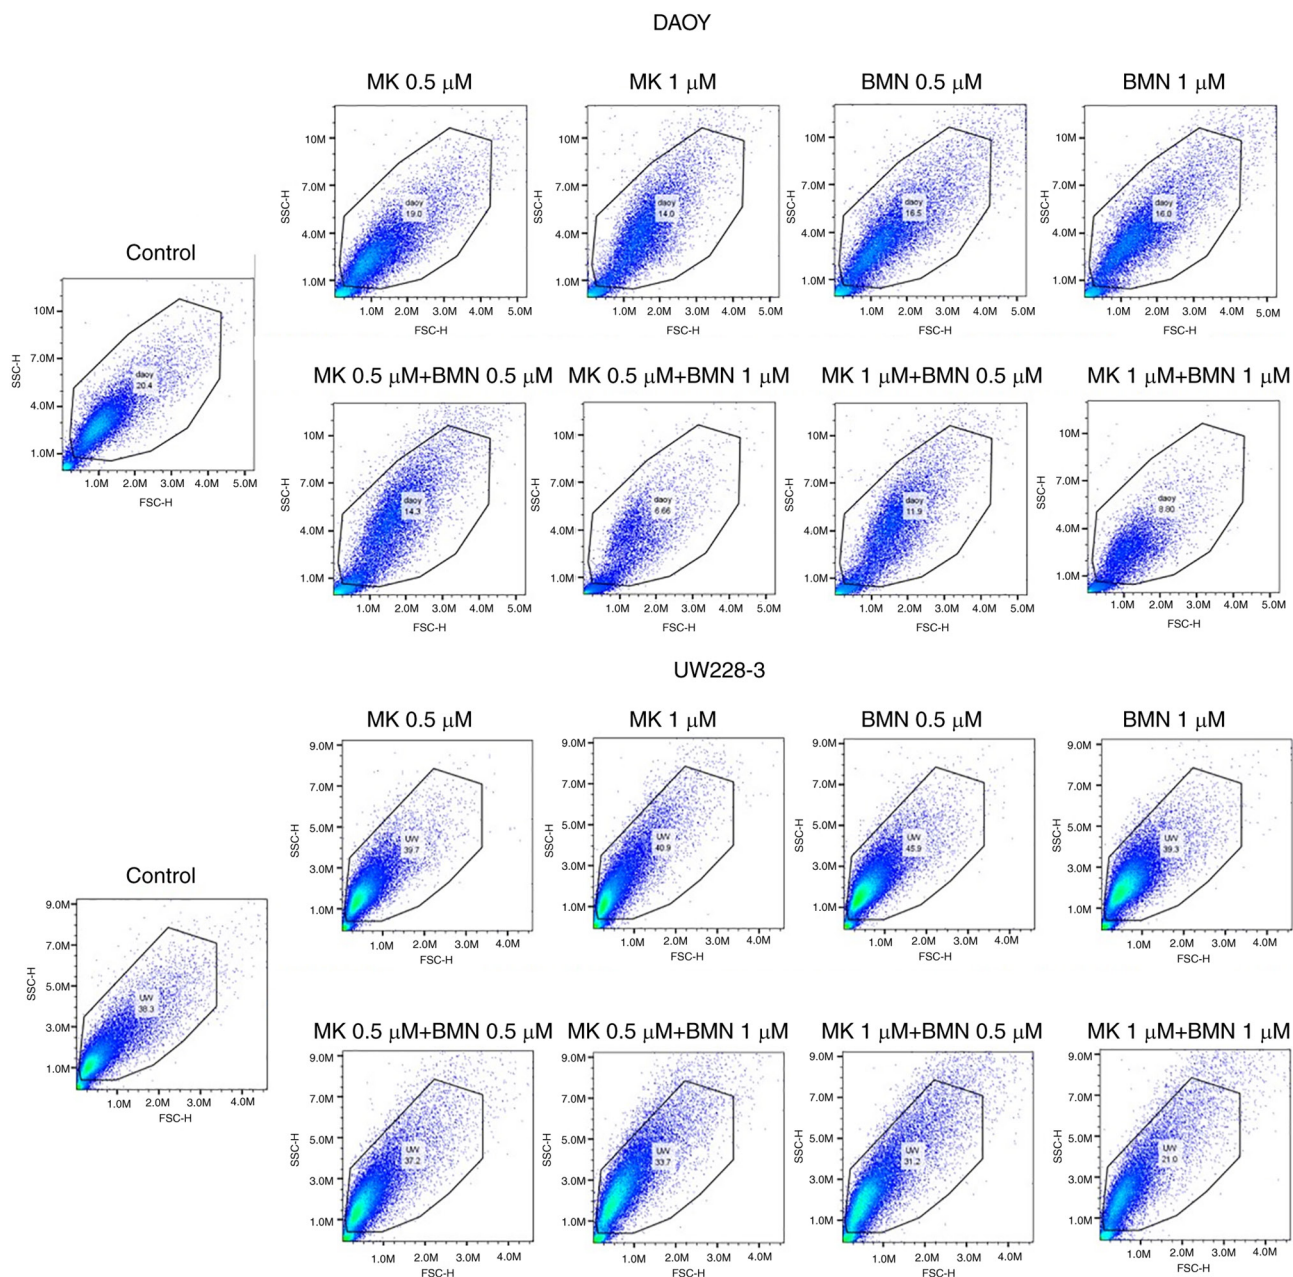

Supplement: Supplementary file 1 [file downloadSupplementary]
